# Supplementary material
Source: Springer Nature journal article supplement (https://www.springermedizin.de/resource/supplementary/12933_2011_349_MOESM3_ESM.pdf/9538222)

**Nvm (mm-3)**

0,07  
0,06  
0,05  
0,04  
0,03  
0,02  
0,01  
0

**Diabetic group**

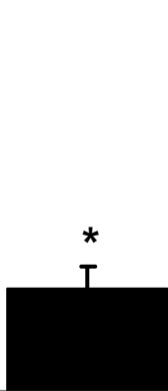

**Hypertensive group**

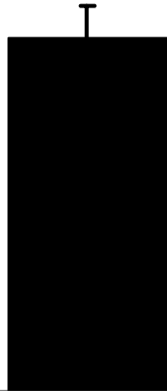

Supplement: MOESM3 [file 9538222]
